# Supplementary material for: Bone Turnover Markers, n-Terminal Propeptide of Type I Procollagen and Tartrate-Resistant Acid Phosphatase Type 5b, for Predicting Castration Resistance in Prostate Cancer
Source: MDPI journal article supplement (doi:10.3390/biomedicines12020292), 2024-01-26
Supplement: s1 [file s1]

a

CSS

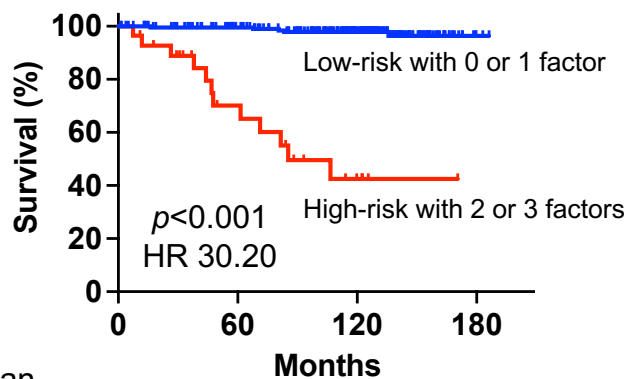

| BGM classification | Median OS | Numbers at risk |     |     |   |
|--------------------|-----------|-----------------|-----|-----|---|
| Low                | NR        | 227             | 188 | 107 | 2 |
| High               | 85.3      | 28              | 15  | 5   | 0 |

b

OS

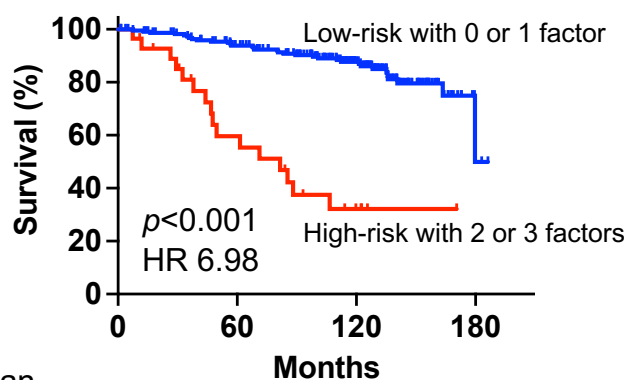

| BGM classification | Median OS | Numbers at risk |     |     |   |
|--------------------|-----------|-----------------|-----|-----|---|
| Low                | 179.7     | 227             | 188 | 107 | 2 |
| High               | 81.6      | 28              | 15  | 5   | 0 |
